# Supplementary material for: The natural history of Get3‐like chaperones
Source: PubMed Central journal article supplement — Traffic. 2019 Apr 29;20(5):311–24. doi: 10.1111/tra.12643 (PMC6593721; doi:10.1111/tra.12643), 2019-04-29
Supplement: TRA-20-311-s001.pdf [file TRA-20-311-s001.pdf]

Title: **The Natural History of Get3-like Chaperones**

**Supplemental Information**

Ákos Farkas<sup>1</sup>, Evelina Ines De Laurentiis<sup>1</sup>, Blanche Schwappach<sup>1,2</sup>

1 Universitätsmedizin Göttingen Institut für Molekularbiologie Humboldtallee 23 D-37073 Göttingen, Germany

2 Max-Planck Institute for Biophysical Chemistry, D-37077 Göttingen, Germany

**Supplemental materials**

**Table S1:** Relates to Table 1. Contains the identifiers of the sequences based on which Table 1 was created. Column E marks the sequences used for the phylogenetic tree in Figure 1.

**Table S2:** Relates to Figure 4B and Figure 4C. Contains the identifiers of the sequences Figure 4B and 4C refers to.

**Table S3:** Relates to Figure 4D. Contains the corresponding data in bacterial phyla not shown in Figure 4D.

**Table S4:** Related to Figure 5E. Contains the data and the names of the taxons used in Figure 4E.

**Supplemental Table Legends**

**Table S1:** List of Get3 homologs used in the current study. The classification of each homolog based on the groups listed in Table 1 and the species they are found in are provided.

**Table S2:** List of Get3 homologs with a potential plastidial or mitochondrial localization used in the current study. The classification of each homolog based on the groups listed in Table 1 and their predicted localization based on TargetP 1.1 are provided. Abbreviations of predictions: C – chloroplast; M – mitochondria; - – no organelle predicted

**Table S3:** Distribution of the number of methionine residues in the region homologous to the sequence from helix 4 to 9 in ScGet3 among bacteria containing Get3 homologs with an  $\alpha$ -crystallin domain.

**Table S4:** Analysis of presence or absence of different types of Get3 or ArsA homologues, number of proteins, membrane proteins, and tail-anchored proteins in the indicated bacterial taxa.

# Table S2

| Group based on Table 1 | Uniprot ID       | Taxonomy    | TargetP 1.1 prediction | Group based on Table 1 | Uniprot ID       | Taxonomy    | TargetP 1.1 prediction |
|------------------------|------------------|-------------|------------------------|------------------------|------------------|-------------|------------------------|
| Group 4                | D8UKL0_VOLCA     | Chlorophyta | C                      | Group 3                | A0A0D2RYE9_GOSRA | Embryophyta | M                      |
| Group 4                | K8F9L6_9CHLO     | Chlorophyta | C                      | Group 3                | A0A059BHV7_EUCGR | Embryophyta | C                      |
| Group 4                | A0A090M8H3_OSTTA | Chlorophyta | M                      | Group 3                | A0A059AC89_EUCGR | Embryophyta | M                      |
| Group 4                | A4S2F3_OSTLU     | Chlorophyta | -                      | Group 3                | V4SPJ7_9ROSI     | Embryophyta | -                      |
| Group 4                | C1EGU4_MICCC     | Chlorophyta | -                      | Group 3                | A0A1U7ZL42_NELNU | Embryophyta | C                      |
| Group 4                | C1MP51_MICPC     | Chlorophyta | M                      | Group 3                | A0A200R5Q6_9MAGN | Embryophyta | C                      |
| Group 4                | E1Z6I9_CHLVA     | Chlorophyta | -                      | Group 3                | A0A2G5D279_AQUCA | Embryophyta | C                      |
| Group 4                | I0YX28_COCSC     | Chlorophyta | M                      | Group 3                | A0A2H3XHX9_PHODC | Embryophyta | C                      |
| Group 3                | M1VA07_CYAM1     | Rhodophyta  | M                      | Group 3                | A0A2H3YRJ4_PHODC | Embryophyta | M                      |
| Group 3                | M2XZS1_GALSU     | Rhodophyta  | -                      | Group 3                | A0A2H9ZUZ8_9ASPA | Embryophyta | M                      |
| Group 3                | R7QLH0_CHOCHR    | Rhodophyta  | -                      | Group 3                | I1IFB4_BRADI     | Embryophyta | M                      |
| Group 3                | A0A176VLW2_MARPO | Embryophyta | C                      | Group 3                | I1YH4_BRADI      | Embryophyta | M                      |
| Group 3                | D8SQW5_SELML     | Embryophyta | M                      | Group 3                | J3LH15_ORYBR     | Embryophyta | M                      |
| Group 3                | D8RTG3_SELML     | Embryophyta | C                      | Group 3                | C5XYT4_SORBI     | Embryophyta | M                      |
| Group 3                | W1NHA6_AMBTC     | Embryophyta | C                      | Group 3                | C5Y9U4_SORBI     | Embryophyta | M                      |
| Group 3                | A0A2G9GYH7_9LAMI | Embryophyta | C                      | Group 3                | B4FXM9_MAIZE     | Embryophyta | M                      |
| Group 3                | A0A2G9HKT1_9LAMI | Embryophyta | M                      | Group 3                | B6TZB7_MAIZE     | Embryophyta | M                      |
| Group 3                | S8E2Y5_9LAMI     | Embryophyta | M                      | Group 3                | K3YT13_SETIT     | Embryophyta | M                      |
| Group 3                | A0A022Q8P4_ERYGU | Embryophyta | C                      | Group 3                | A0A1E5WCP2_9POAL | Embryophyta | M                      |
| Group 3                | A0A022RIQ3_ERYGU | Embryophyta | C                      | Group 3                | M0TT67_MUSAM     | Embryophyta | C                      |
| Group 3                | A0A1J6TG7_NICAT  | Embryophyta | C                      | Group 3                | A0A0K9PK69_ZOSMR | Embryophyta | C                      |
| Group 3                | A0A1U7XLU8_NICSY | Embryophyta | C                      | Group 2                | A0A250XGS9_9CHLO | Chlorophyta | M                      |
| Group 3                | A0A1U8F339_CAPAN | Embryophyta | C                      | Group 2                | A0A2J8A6T7_9CHLO | Chlorophyta | M                      |
| Group 3                | A0A1S3Z6A3_TOBAC | Embryophyta | C                      | Group 2                | ASNA1_CHLRE      | Chlorophyta | M                      |
| Group 3                | A0A1U7XLE1_NICSY | Embryophyta | C                      | Group 2                | A0A150GLK6_GONPE | Chlorophyta | C                      |
| Group 3                | A0A1S3X3L0_TOBAC | Embryophyta | M                      | Group 2                | A0A087SRG6_AUXPR | Chlorophyta | M                      |
| Group 3                | A0A1S4C163_TOBAC | Embryophyta | C                      | Group 2                | A0A2P6TQD2_CHLSO | Chlorophyta | C                      |
| Group 3                | K4DAD9_SOLLC     | Embryophyta | C                      | Group 2                | M2XUU5_GALSU     | Rhodophyta  | M                      |
| Group 3                | M1AE76_SOLTU     | Embryophyta | M                      | Group 2                | M1UWD0_CYAM1     | Rhodophyta  | -                      |
| Group 3                | M1AE77_SOLTU     | Embryophyta | M                      | Group 2                | A0A1X6PKT4_PORUM | Rhodophyta  | C                      |
| Group 3                | A0A0A0KWR9_CUCSA | Embryophyta | C                      | Group 2                | R7QK77_CHOCHR    | Rhodophyta  | C                      |
| Group 3                | A0A1S3BFJ9_CUCME | Embryophyta | C                      | Group 5                | I1D51_BRADI      | Embryophyta | C                      |
| Group 3                | A0A2I4FAM5_JUGRE | Embryophyta | C                      | Group 5                | J3LGE0_ORYBR     | Embryophyta | C                      |
| Group 3                | A0A2I4GLQ3_JUGRE | Embryophyta | -                      | Group 5                | A3AAM6_ORYSJ     | Embryophyta | C                      |
| Group 3                | A0A2I4GLR1_JUGRE | Embryophyta | C                      | Group 5                | K3YSP5_SETIT     | Embryophyta | M                      |
| Group 3                | A0A1S2YK80_CICAR | Embryophyta | M                      | Group 5                | C5XZY5_SORBI     | Embryophyta | M                      |
| Group 3                | A0A1S3E4U6_CICAR | Embryophyta | C                      | Group 5                | M7YIF9_TRIUA     | Embryophyta | -                      |
| Group 3                | A0A072UVV6_MEDTR | Embryophyta | C                      | Group 5                | A0A1D6HI20_MAIZE | Embryophyta | C                      |
| Group 3                | G7I505_MEDTR     | Embryophyta | C                      | Group 5                | A0A2I0AHV9_9ASPA | Embryophyta | M                      |
| Group 3                | A0A072VNY3_MEDTR | Embryophyta | C                      | Group 5                | A0A2H3XR00_PHODC | Embryophyta | C                      |
| Group 3                | A0A2K3NMY2_TRIPR | Embryophyta | M                      | Group 5                | A0A0K9NU83_ZOSMR | Embryophyta | C                      |
| Group 3                | A0A2K3LCV4_TRIPR | Embryophyta | M                      | Group 5                | A0A1J6IDG8_NICAT | Embryophyta | C                      |
| Group 3                | I1LCZ2_SOYBN     | Embryophyta | C                      | Group 5                | A0A1S4CY11_TOBAC | Embryophyta | C                      |
| Group 3                | I1NH33_SOYBN     | Embryophyta | C                      | Group 5                | A0A1S3YPY0_TOBAC | Embryophyta | C                      |
| Group 3                | A0A1S3V658_VIGRR | Embryophyta | C                      | Group 5                | A0A1U8ETJ7_CAPAN | Embryophyta | C                      |
| Group 3                | V7BGY9_PHAVU     | Embryophyta | C                      | Group 5                | A0A2G3B6J8_CAPCH | Embryophyta | C                      |
| Group 3                | B9SY64_RICCO     | Embryophyta | C                      | Group 5                | K4BXG6_SOLLC     | Embryophyta | C                      |
| Group 3                | A0A067LIE1_JATCU | Embryophyta | C                      | Group 5                | D7KQU0_ARALL     | Embryophyta | C                      |
| Group 3                | A0A067LHD2_JATCU | Embryophyta | M                      | Group 5                | A0A178WMJ2_ARATH | Embryophyta | C                      |
| Group 3                | A9PGI6_POPTR     | Embryophyta | C                      | Group 5                | A0A087HR01_ARAAL | Embryophyta | C                      |
| Group 3                | A0A1Q3B3K7_CEPFO | Embryophyta | C                      | Group 5                | R0GLF8_9BRAS     | Embryophyta | C                      |
| Group 3                | A0A1Q3B3X1_CEPFO | Embryophyta | M                      | Group 5                | A0A1S2Z867_CICAR | Embryophyta | C                      |
| Group 3                | A0A2P5D3Y8_TREOI | Embryophyta | C                      | Group 5                | V4K9A9_EUTSA     | Embryophyta | C                      |
| Group 3                | W9SYC9_9ROSA     | Embryophyta | C                      | Group 5                | K7K7G9_SOYBN     | Embryophyta | C                      |
| Group 3                | W9S2I5_9ROSA     | Embryophyta | M                      | Group 5                | A0A1J7V84_LUPAN  | Embryophyta | C                      |
| Group 3                | M5X6A8_PRUPE     | Embryophyta | C                      | Group 5                | G7JX27_MEDTR     | Embryophyta | C                      |
| Group 3                | A0A087H8G3_ARAAL | Embryophyta | C                      | Group 5                | V7C5C5_PHAVU     | Embryophyta | C                      |
| Group 3                | D7L8X8_ARALL     | Embryophyta | C                      | Group 5                | A0A2K3PL22_TRIPR | Embryophyta | C                      |
| Group 3                | F4J3Q8_ARATH     | Embryophyta | C                      | Group 5                | M5XS14_PRUPE     | Embryophyta | C                      |
| Group 3                | A0A0D3AER6_BRAOL | Embryophyta | C                      | Group 5                | W9R3Z1_9ROSA     | Embryophyta | M                      |
| Group 3                | V4M2J4_EUTSA     | Embryophyta | C                      | Group 5                | A0A2P5DQ30_PARAD | Embryophyta | M                      |
| Group 3                | A0A087GCJ7_ARAAL | Embryophyta | M                      | Group 5                | A0A2P5ENF6_TREOI | Embryophyta | M                      |
| Group 3                | D7MUD3_ARALL     | Embryophyta | M                      | Group 5                | A0A1R3J603_COCAP | Embryophyta | C                      |
| Group 3                | Q5XF80_ARATH     | Embryophyta | M                      | Group 5                | A0A1R3KIF2_9ROSI | Embryophyta | C                      |
| Group 3                | A0A0D3AKN9_BRAOL | Embryophyta | M                      | Group 5                | S8DUW4_9LAMI     | Embryophyta | -                      |
| Group 3                | ROEWE9_9BRAS     | Embryophyta | M                      | Group 5                | A0A0D2PSL0_GOSRA | Embryophyta | C                      |
| Group 3                | V4N939_EUTSA     | Embryophyta | M                      | Group 5                | A0A067KAR8_JATCU | Embryophyta | C                      |
| Group 3                | A0A1R3HAK3_COCAP | Embryophyta | -                      | Group 5                | W1P8W2_AMBTC     | Embryophyta | C                      |
| Group 3                | A0A1R3J9V5_9ROSI | Embryophyta | -                      | Group 5                | A0A2G5D7X1_AQUCA | Embryophyta | C                      |
| Group 3                | A0A2I0IRW4_PUNGR | Embryophyta | M                      | Group 5                | A0A1Q3CBM7_CEPFO | Embryophyta | C                      |
| Group 3                | A0A2I0J6S8_PUNGR | Embryophyta | M                      | Group 5                | A0A1S3BET7_CUCME | Embryophyta | C                      |
| Group 3                | A0A0B0N3P8_GOSAR | Embryophyta | C                      | Group 5                | A0A059BF85_EUCGR | Embryophyta | C                      |
| Group 3                | A0A0D2SBJ4_GOSRA | Embryophyta | C                      | Group 5                | A0A2I4FWX0_JUGRE | Embryophyta | C                      |
| Group 3                | A0A1U8N7T4_GOSHI | Embryophyta | C                      | Group 5                | A0A200Q3L2_9MAGN | Embryophyta | C                      |
| Group 3                | A0A0B0PPN1_GOSAR | Embryophyta | C                      | Group 5                | A0A176VIM6_MARPO | Embryophyta | C                      |
| Group 3                | A0A0D2RS72_GOSRA | Embryophyta | C                      | Group 5                | A0A1U8A7V7_NELNU | Embryophyta | C                      |
| Group 3                | A0A1U8KDC9_GOSHI | Embryophyta | C                      | Group 5                | D8QQV2_SELML     | Embryophyta | -                      |
|                        |                  |             |                        | Group 5                | D8R829_SELML     | Embryophyta | -                      |

C: chloroplast; M: mitochondria; -: no organelle predicted

**Table S3****Alpha-crystallin domain containing Get3 homologs in bacteria**

| <b>Bacterial phyla</b> | <b>Number of Met residues between helix 4 and 9</b> |           |           |           |           |           |           |          |           |           |          | <b>Total</b> |            |
|------------------------|-----------------------------------------------------|-----------|-----------|-----------|-----------|-----------|-----------|----------|-----------|-----------|----------|--------------|------------|
|                        | 0                                                   | 1         | 2         | 3         | 4         | 5         | 6         | 7        | 8         | 9         | 11       |              |            |
| Acidobacteria          |                                                     |           |           |           |           |           | 2         |          |           |           |          |              | 2          |
| Actinobacteria         | 5                                                   | 18        | 19        | 12        | 5         | 3         |           |          |           |           |          |              | 62         |
| Aquificae              |                                                     |           |           | 2         | 2         | 1         | 1         |          |           |           |          |              | 6          |
| Bacteroidetes          |                                                     |           |           |           |           | 2         | 1         |          |           |           |          |              | 3          |
| Chlorobi               |                                                     |           |           | 1         | 5         | 11        | 17        | 1        | 37        | 6         |          |              | 78         |
| Chloroflexi            |                                                     |           | 2         | 4         |           | 2         | 1         |          | 2         | 3         |          |              | 14         |
| Cyanobacteria          |                                                     |           | 3         | 1         | 24        | 16        | 30        |          |           |           |          |              | 74         |
| Firmicutes             |                                                     |           | 1         | 3         | 8         | 4         | 5         | 1        | 21        | 3         | 1        |              | 47         |
| Fusobacteria           |                                                     |           |           | 1         | 7         |           |           |          |           |           |          |              | 8          |
| Proteobacteria         |                                                     | 1         |           |           | 1         | 1         |           | 1        |           |           |          |              | 4          |
| Spirochaetes           |                                                     |           | 1         |           | 1         |           |           |          |           |           |          |              | 2          |
| Thermodesulfobacteria  |                                                     |           |           |           | 1         |           |           |          |           |           |          |              | 1          |
| <b>Total</b>           | <b>5</b>                                            | <b>19</b> | <b>26</b> | <b>24</b> | <b>54</b> | <b>40</b> | <b>57</b> | <b>3</b> | <b>60</b> | <b>12</b> | <b>1</b> |              | <b>301</b> |

**Table S4**

| Uniprot taxon ID                                                                                                    | Phylum         | Get3 homolog<br>with TRC40-<br>insert | ArsA | Comment                       | Total<br>proteins | Membrane<br>proteins | TA<br>proteins |
|---------------------------------------------------------------------------------------------------------------------|----------------|---------------------------------------|------|-------------------------------|-------------------|----------------------|----------------|
| <i>Algibacter alginicyticus</i>                                                                                     | Bacteroidetes  |                                       | yes  |                               | 3236              | 741                  | 25             |
| <i>Aquifex aeolicus</i>                                                                                             | Aquificae      | yes                                   |      |                               | 1560              | 318                  | 9              |
| <i>Bacillus cereus</i> (strain ZK / E33L)                                                                           | Firmicutes     | yes                                   | yes  |                               | 5639              | 1688                 | 48             |
| <i>Bacteroides thetaiotaomicron</i> (strain ATCC 29148 / DSM 2079 / NCTC 10582 / E50 / VPI-5482)                    | Bacteroidetes  |                                       | yes  |                               | 4783              | 1176                 | 37             |
| <i>Burkholderia multivorans</i> (strain ATCC 17616 / 249)                                                           | Proteobacteria |                                       | yes  |                               | 6043              | 1439                 | 48             |
| <i>Chloracidobacterium thermophilum</i> (strain B)                                                                  | Acidobacteria  | yes                                   |      |                               | 3054              | 736                  | 25             |
| <i>Chlorobaculum tepidum</i> (strain ATCC 49652 / DSM 12025 / NBRC 103806 / TLS) ( <i>Chlorobium tepidum</i> )      | Chlorobi       | yes                                   |      |                               | 2251              | 464                  | 42             |
| <i>Clostridium neonatale</i>                                                                                        | Firmicutes     |                                       | yes  |                               | 4004              | 1024                 | 19             |
| <i>Cutibacterium granulosum</i> DSM 20700                                                                           | Actinobacteria |                                       | yes  |                               | 5074              | 1228                 | 37             |
| <i>Desulfallas gibsoniae</i> DSM 7213                                                                               | Firmicutes     | yes                                   |      |                               | 4314              | 938                  | 61             |
| <i>Desulfobacca acetoxidans</i> (strain ATCC 700848 / DSM 11109 / ASRB2)                                            | Proteobacteria | yes                                   |      | double domain<br>Get3 homolog | 2862              | 714                  | 30             |
| <i>Fusobacterium nucleatum</i> subsp. <i>nucleatum</i> (strain ATCC 25586 / CIP 101130 / JCM 8532 / LMG 13131)      | Fusobacteria   | yes                                   |      |                               | 2050              | 479                  | 37             |
| <i>Klebsiella pneumoniae</i> subsp. <i>pneumoniae</i> (strain ATCC 700721 / MGH 78578)                              | Proteobacteria |                                       | yes  |                               | 5127              | 1245                 | 43             |
| <i>Lactobacillus plantarum</i> (strain ATCC BAA-793 / NCIMB 8826 / WCFS1)                                           | Firmicutes     |                                       | yes  |                               | 3088              | 857                  | 21             |
| <i>Leptospirillum ferrooxidans</i> (strain C2-3)                                                                    | Nitrospirae    |                                       | yes  |                               | 2414              | 583                  | 17             |
| <i>Lysinibacillus macroides</i>                                                                                     | Firmicutes     |                                       | yes  |                               | 4250              | 1097                 | 26             |
| <i>Magnetospirillum caucaseum</i>                                                                                   | Proteobacteria |                                       | yes  |                               | 4651              | 873                  | 37             |
| <i>Megasphaera cerevisiae</i> DSM 20462                                                                             | Firmicutes     |                                       | yes  |                               | 2843              | 622                  | 36             |
| <i>Methylobacillus flagellatus</i> (strain KT / ATCC 51484 / DSM 6875)                                              | Proteobacteria |                                       | yes  |                               | 2610              | 661                  | 15             |
| <i>Myxococcus fulvus</i> (strain ATCC BAA-855 / HW-1)                                                               | Proteobacteria | yes                                   |      | double domain<br>Get3 homolog | 7269              | 1308                 | 54             |
| <i>Nocardia farcinica</i> (strain IFM 10152)                                                                        | Actinobacteria | yes                                   |      |                               | 5944              | 1267                 | 35             |
| <i>Nostoc punctiforme</i> (strain ATCC 29133 / PCC 73102)                                                           | Cyanobacteria  | yes                                   |      | double domain<br>Get3 homolog | 6608              | 1542                 | 79             |
| <i>Pirellula staleyii</i> (strain ATCC 27377 / DSM 6068 / ICPB 4128) ( <i>Pirella staleyii</i> )                    | Planctomycetes |                                       | yes  |                               | 4712              | 1304                 | 46             |
| <i>Planctopirus limnophila</i> (strain ATCC 43296 / DSM 3776 / IFAM 1008 / 290) ( <i>Planctomyces limnophilus</i> ) | Planctomycetes |                                       | yes  |                               | 4259              | 1122                 | 43             |
| <i>Planococcus plakortidis</i>                                                                                      | Firmicutes     | yes                                   |      |                               | 3056              | 843                  | 11             |
| <i>Roseiflexus castenholzii</i> (strain DSM 13941 / HLO8)                                                           | Chloroflexi    | yes                                   |      |                               | 4325              | 1211                 | 29             |
| <i>Salinicoccus halodurans</i>                                                                                      | Firmicutes     | yes                                   | yes  |                               | 2634              | 678                  | 15             |
| <i>Treponema caldarium</i> (strain ATCC 51460 / DSM 7334 / H1) ( <i>Spirochaeta caldaria</i> )                      | Spirochaetes   | yes                                   |      |                               | 2755              | 755                  | 9              |
